# Supplementary material for: Effectiveness of interventions during NICU hospitalization on the neurodevelopment of preterm infants: a systematic review protocol
Source: Springer Nature journal article supplement (doi:10.1186/s13643-017-0613-5), 2017-11-03
Supplement: MOESM2 [file 15190232]

Additional file 2  
MEDLINE Search strategy

| Steps | Research Equation                                                                                                                                                                                                                                                                                                                                 | Results |
|-------|---------------------------------------------------------------------------------------------------------------------------------------------------------------------------------------------------------------------------------------------------------------------------------------------------------------------------------------------------|---------|
| 1     | exp intensive care units, pediatric/ or Neonatal Nursing/ or Intensive Care, Neonatal/ or intensive care units/ or hospital units/ or nurseries, hospital/ or exp pediatrics/                                                                                                                                                                     | 127 964 |
| 2     | ((neonat* OR pediatric\$1 OR birth\$1 OR newborn* OR bab\$3 OR infant\$1) adj5 ("intensive care?" OR "care unit?" OR "care center?" OR hospital*)) OR "NICU" OR "perinatal center?" OR "growing care unit?" OR "intensive care unit?").ti,ab                                                                                                      | 120 198 |
| 3     | neurodevelopmental disorders/ or Neurologic Examination/ or psychomotor performance/ or neurobehavioral manifestations/ or psychomotor disorders/ or cognition disorders/ or auditory perceptual disorders/ or cognitive dysfunction/ or Child Development/ or motor skills/ or motor skills disorders/ or Motor Activity/ or Movement Disorders/ | 302 922 |
| 4     | (neurodevelopment* OR ((neurologic* OR neurobehavi* OR neuromotor* OR cogniti* OR cerebral OR brain? OR "nervous system") adj3 (problem\$1 OR impair* OR abilit\$3 OR disorder\$1 OR disab* OR development*)) OR (motor adj3 (skill\$1 OR activit\$3 OR control OR impair*)) OR "infant development").ti,ab                                       | 231 230 |
| 5     | exp infant, premature/ or exp infant, low birth weight/ or premature birth/ or *Infant, Newborn/                                                                                                                                                                                                                                                  | 90 858  |
| 6     | ((infant\$1 OR bab\$3 OR newborn\$1 OR birth\$1 OR neonat*) adj4 (prematu* OR pre?term OR (low adj2 weight))).ti,ab                                                                                                                                                                                                                               | 82 130  |
| 7     | (1 OR 2) AND (3 OR 4) AND (5 OR 6)                                                                                                                                                                                                                                                                                                                | 1 916   |
| 8     | 7 AND (English OR French).lg                                                                                                                                                                                                                                                                                                                      | 1 775   |
| 9     | limit 8 to yr="2002 - 2017"                                                                                                                                                                                                                                                                                                                       | 1 304   |
